# Supplementary material for: Governance and trust in sustainability-based agri-food value chains. A comparative analysis of five cases in Germany
Source: Frontiers journal article supplement (doi:10.3389/fsufs.2023.1130895), 2023-06-28
Supplement: Table_1.XLSX [file Table_1.XLSX]

## Sheet: Database
							Absatzkanäle (wie z.B. Lebensmitteleinzelhandel, Fachgeschäfte, Direktvermarktung) gruppiert
General information								Product			Public good						Governance						Actors			Support
No.	Brand	Source	Value chain	Ownership (actor type)	Farm management	Marketing Area	Distribution channel	Farming system	Product type	Product	Sustainability dimension	Natural ressource	Public good addressed	Measure	Commercialization of the public good	Claim	Certification	Defined criteria	Control system	Sanction mechanism	Agenda Setting	Co-Regulation	Actor types	No. actor types	Actors	Financial support	Research	Extension
1	Wasserschutzbrot	https://www.wasserschutzbrot.de/	Bread	State	conventional	Bavaria	Specialized retail	Arable farming	grain	grain	Ecology	Water	water protection	reduzierte Stickstoffdüngung	Product-coupled	Water conservation wheat regional and water conservation	yes	yes	n.n.	n.n	public/private actor	Wissenschaft	Farmers Water suppliers Processors specialized trade agricultural advisors Science	6	Farmers Water suppliers (several) Mills bakers agricultural advisors FIBL	Premium by local water supplier	FiBL	Yes (standard)
2	Landwirtschaft für Artenvielfalt	https://www.landwirtschaft-artenvielfalt.de/	various	Food Retail, Civil Society	conventional + organic farming	Northern Germany	Food retail	Various, especially fruits	various	various, e.g. apples	Ecology	Biodiversity	Species protection	various	Product-coupled	farming for biodiversity	yes	yes	yes	n.n.	private actor	NGO Wissenschaft	Producer LEH Organic Growers Association Science	5	WWF Biopark EDEKA ZALF Ministerium für Landwirtschaft, Umwelt und Verbraucherschutz Mecklenburg-Vorpommern	Support for organic farming	ZALF	Yes (specialized)
3	TerraSuisse	https://www.migros.ch/de/einkaufen/migros-marken/terrasuisse/richtlinien.html https://www.vogelwarte.ch/de/projekte/lebensraeume/terrasuisse-by-migros-und-ip-suisse	various	Food Retail	conventional + organic farming	Switzerland	Food retail	various	various	various, cheese	Ecology, Social	various	Species protection	various	Product-coupled	For nature and animal	yes	yes	yes	yes	private actor	Erzeuger LEH Wissenschaft NGO	Farmers NGO Food retail Science Administration	4	Vogelwarte Sempach FIBL migros IP Suisse	n.n.	n.n.	Yes (specialized)
4	Unser Land	https://www.unserland.info/	various	Civil Society	conventional + organic farming	Bavaria	various	various	various	various, e.g. potatoes	Ecology, Social, Economy	various	Animal and species protection	various	Product-coupled	our land	yes	yes	yes	yes	private actor	Solidargemeinschaft	Producer Processor Solidarity Marketer	4	Solidargemeinschaften Unser Land Verarbeiter Vermarkter	n.n.	n.n.	n.n.
5	Pro Planet	https://pro-planet.info/	various	Food Retail	conventional + organic farming	Germany	Food retail	various	various	various, dairy products	Ecology	various	various	various	Product-coupled	for more biodiversity	yes	partly	yes	yes	private actor	Beirat Wissenschaft	LEH_x000D_ Producer_x000D_ Advisory Board_x000D_ Science	4	REWE, Penny, toom CSCP (Collaborating Centre on Sustainable Consumption and Production) Fachbeirat https://pro-planet.info/	n.n.	yes	yes (standard)
6	Heumilch (Arge)	https://www.heumilch.com/	Dairy products	Civil Society	conventional + organic farming	Germany	Food retail	Suckler cow husbandry	dairy products	milk	Ecology, Social	various	Species protection	extensive grassland	Product-coupled	n.n.	yes	yes	yes	yes	staatlich/privat	Staat (garantierte taatliche Qualität)	ARGE Haymilk Austria - Accredited certification bodies - Processors - producers - other contractors	5	• ARGE Heumilch Österreich als Programmeigner (Antragstellende Vereinigung) • Akkreditierte Zertifizierungsstellen nach den Anforderungen der ISO/IEC 17065 als Kontrollstellen für dieses Programm • Verarbeiter (Molkereien, Käsereien etc.) als Zertifizierungswerber • Erzeuger (landwirtschaftliche Milcherzeugungsbetriebe) als Zulieferer von Verarbeitern und • sonstige Lohnunternehmen wie z.B. Lohnv…	n.n.	Yes	n.n.
7	ALB-GOLD Teigwaren GmbH	https://www.alb-gold.de/wir-tun-was/biodiversitaet.html	Pasta	Private business, Processer	conventional + organic farming	Germany	various	Arable farming	grain, pasta	Pasta	Ecology, Social	Biodiversity	Species protection	various	Product-coupled	n.n.	yes	yes	n.n.	n.n.	private actor	"Agrarökologie und Biodiversität (IFAB) in Mannheim ein Monitoring gestartet, das in den nächsten drei Jahren die Wirksamkeit der Maßnahmen messbar machen und dokumentieren soll" (https://www.alb-gold.de/wir-tun-was/biodiversitaet.html, 9.7.2020)	Processor Producer	2	Alb-Gold Erzeuger	n.n.	IFAB	n.n.
8	Milchwerke Berchtesgadener Land Chiemgau eG	https://bergbauernmilch.de/de/unsere-molkerei.html#nachhaltigkeit	Dairy products	Private business, Processer	conventional + organic farming	Germany	various	Suckler cow husbandry	dairy products	milk	Ecology, Social, Economy	biodiversity	Species protection	140 managed alpine pastures with unique biodiversity (29 species per 25 sqm). farmers feed guaranteed without genetic engineering and renounce the use of glyphosate Wild and Cultivated" project for the preservation of flowering meadows	Product-coupled	n.n.	yes	partly	partly	partly	public/private actor	Staat	Processor Producer		Molkerei Erzeuger	Support for organic farming	n.n.	Yes (specialized)
9	AgoraNatura	https://agora-natura.de/	various	Research	conventional + organic farming	Germany	Online certificates trading	various	various	various	Ecology	various	various	verschiedene	own market	Because nature is added value!	no	yes	yes	no	private and civil society actor	Wissenschaft	Project "Provider Operator online marketplace (buyer of the certificates)	2	Projekt-"Bereitsteller" Betreiber-Onlinemarktplatz AgoraNatura (Käufer der Zertifikate)	Public funding (Ministry for Environment)	yes	n.n.
10	Einheimischer	http://www.einheimischer.de/obst/qualitaet/	Juice	Private business, Processer	conventional	Bavaria	various	fruits	Beverages	Juice	Ecology, Social	biodiversity	Landscape and Species protection	Planting and management of orchards	Product-coupled	EinHeimischer ... does not fall far from the tree!	no	no	no	no	n.n.	?	Processor Producer	2	Erzeuger Genossenschaft EinHeimischer	n.n.	n.n.	n.n.
11	Ökoregion Kaindorf (AT), Humuszertifikate	https://www.oekoregion-kaindorf.at/humusaufbau.95.html	Certificates	State	conventional + organic farming	Germany	Online certificates trading	Arable farming	various	various	Ecology	climate	Carbon sequestration	Humus	own market	n.n.	yes	yes	yes	n.n.	private actor		Farmers SME Food retail Consulting	4	Lebensmitteleinzelhandel	n.n.	n.n.	n.n.
12	ei care	https://www.aktion-ei-care.de/eicare-projekt.html https://edoc.hu-berlin.de/bitstream/handle/18452/21681/ginkoo%20Projektbericht_Ergebnisbrosch%C3%BCre%20ethische%20Gefl%C3%BCgelhaltung_online.pdf?sequence=1&isAllowed=y	Eggs	Private business, Processer	organic farming	Brandenburg	Food retail	animal husbandry	eggs and poultry	eggs, meat	Social	animal welfare	Animal protection	n.n.	Product-coupled	n.n.	yes	n.n.	n.n.	n.n.	private actor		Farmers Specialized trade Science	3	6 Erzeugerbetriebe Terra Naturkost Marktgesellschaft der Naturland Bauern AG	n.n.	n.n.	n.n.
13	SOLAWI Waldgarten	https://www.solawi-waldgarten.de/	various	Producer, Consumer	organic farming	Berlin/Brandenburg	Direct sales channel	various	various	fruits, vegetables	Ecology, Social, Economy	various	various	Organic farming	Product-coupled	n.n.	yes	yes	yes	yes	public actor	Verbraucher	Processor Producer	2	Biohof Waldgarten Solawi-Anteilseigner	Support for organic farming	n.n.	Yes (specialized)
14	Initiative Tierwohl	https://initiative-tierwohl.de/initiative/ueber-uns/	various	Food Retail	conventional	Germany	Food retail	animal husbandry	various	various	Economy	animal welfare	Animal protection	Various measures, e.g. QS system, antibiotic monitoring, stable climate check, organic employment material, space, footpad health, further training, etc.	Product-coupled	For the first time, companies and associations from agriculture, the meat industry and food retailing are working together for more animal-friendly and sustainable meat production. Market-wide expansion of standards in livestock farming. Financing of the additional effort by retail companies.	yes	yes	yes	yes	private actor	LEH	Livestock farmers, Slaughterhouses LEH	3	n.n.	n.n.	n.n.	Yes (specialized)
15	Landmarkt ("Besser direkt vom Bauern")	https://landmarkt.hessische-direktvermarkter.de/node http://www.schaeferei-schmid.de/ueberuns/	various	Civil Society	conventional + organic farming	Hesse	various	various, especially animal husbandry	various	various	Ecology, Economy	various	Landscape and Species protection	n.n.	Product-coupled	"By eating Wetterau lamb, they are not only eating healthy, but also supporting the stewardship of ecologically significant land in the Wetterau region at the same time."	yes	yes	yes	yes	private actor		Farmers (180 farms in Hesse), LEH, Association of Hessian Direct Marketers e.V.	3	Landwirtschaftliche Betriebe, z.B. Schäferei Schmid; REWE, VHD	n.n.	n.n.	n.n.
16	Neumarkter Lammsbräu	https://www.lammsbraeu.de/ueber-uns	Beverages	Private business, Processer	organic farming	Germany	various	Arable farming	various	brewing raw material	Ecology, Social, Economy	various	various	n.n.	Product-coupled	Organic pioneer for beverages - all sourced raw and basic materials are from controlled organic cultivation	yes	yes	yes	yes	private and public actor		Producer Producer group Processor	3	Landwirtschaftliche Betriebe, EZÖB, Lammsbräu	n.n.	yes	n.n.
17	Bruderhahn Initiative Deutschland	https://www.bruderhahn.de/initiative/	Eggs and poultry	Private business, Processer	organic farming	Germany	various	animal husbandry	various	eggs, meat	Ecology, Social	animal welfare	animal protection	4 Ct surcharge per egg, financing the rearing of male chicks; guarantee: minimum 14 weeks rearing according to Demeter/Bioland guidelines (with free-range access).	Product-coupled	"4 cents for ethics"	yes	yes	yes	n.n.	private and public actor		Producer Producer group Processor	3	30 Demeter/Bioland-Betriebe, versch. Bio-Supermärkte, Träger: Ökologische Tierzucht GmbH (von Demeter und Bioland)	n.n.	n.n.	n.n.
18	Du bist hier der Chef	https://dubisthierderchef.de/unsere-produkte	various	Consumer	conventional + organic farming	Germany	Food retail	animal husbandry	dairy products	milk	Ecology, Economy	animal welfare	animal protection	Measures are priced: Consumer milk costs RRP: 1.45 (of which: €0.58 to farmer).	Product-coupled	Good, fair and sustainable products that consumers have chosen together	yes	yes	yes	n.n.	public actor		Producer Processor (dairy) LEH Consumer	4	n.n.	n.n.	n.n.	n.n.
19	Wicked Cricket	https://wickedcricket.de/	Insects	Private business, Processer	conventional + organic farming	Germany	various	animal husbandry	insects	insects	Ecology	various	Animal protection	Only vegetable feeding of insects; PLA packaging, new form of production for farmers.	Product-coupled	Healthy, green, awesome!	no	no	n.n.	n.n.	n.n.		Breeders and growers Processor (Wicked Cricket) Trade Consumer	4	n.n.	n.n.	n.n.	n.n.
20	Kumpel und Keule	http://www.kumpelundkeule.de/unser-fleisch	Meat	Private business, Processer	conventional + organic farming	Berlin	Direct sales channel	animal husbandry	meat	meat (Beef, pork, deer)	Ecology, Social, Economy	various	various	Transparent butchery (transparency); Swabian-Haellian pig from acorn fattening, year-round game from Brandenburg without driven hunts, Hohenlofen lambs from pasture and ewe farming, wild turkeys	Product-coupled	Bringing back honest enjoyment through all-embracing quality from the field to the plate, transparency and artisanal production	partly	partly	no	n.n.	n.n.		Producer Processor Butchery (mate and leg) Consumer	4	Verschiedene Betriebe in Deutschland (z.B. Erzeuegergemeinschaft Schwäbisch Hall, Wildhof Michael Bjarsch,	n.n.	n.n.	n.n.
21	Weidemilch (Lidl)	https://proweideland.eu/	Dairy products	Food Retail	conventional + organic farming	North-East Germany	Food retail	Suckler cow husbandry	dairy products	milk	Ecology, Economy	animal welfare	animal welfare and biodiversity	More than 120 days a year on pasture for more than six hours a day; at least 2,000 square meters of grassland per dairy cow per year, year-round freedom of movement, GMO-free feed.	Product-coupled	Pasture milk as an example of merit concepts (enhancement of the milk product, animal welfare!)	yes	yes	yes	yes	n.n.		Producer Dairy (Arla) Pasture Charter signatories (26 organizations) LEH Consumer	5	n.n.	Funding by the Regional Government (Land Niedersachsen)	n.n.	n.n.
22	RegioFair	http://www.regiofair.ch/Aktuelles/tabid/57/language/de-CH/Default.aspx	various	Food Retail	organic farming	Switzerland	specialized food retail	various	various	various	Ecology, Social, Economy	various	variuos	n.n.	Product-coupled	organic, fair and regional!	yes	yes	yes	n.n.	n.n.		Producer Processor Marketing Specialty stores Consumers	5	Schweizer Biobetriebe RegioFair Agrivision AG Fachgeschäfte	n.n.	n.n.	n.n.
23	Gemeinsam Boden gut machen	https://www.alnatura.de/de-de/ueber-uns/alnatura-initiativen/alnatura-bio-bauern-initiative/ https://www.nabu.de/natur-und-landschaft/landnutzung/landwirtschaft/anbaumethoden/oekolandbau/19580.html	various	Food Retail	organic farming	Germany	various	various	various	various	Ecology, Social, Economy	various	various	1 Ct. Per product in order to finance the project	Product-coupled	Helping to improve our soils, waters and protect biodiversity.	yes	yes	yes	yes	n.n.		Producer Processor NGO Trade Consumer		NABU (Projektträger), Alnatura	NABU	n.n.	n.n.
24	Bohlsener Mühle	https://bohlsener-muehle.de/	various	Unternehmen/Verarbeiter	organic farming	Germany	specialized food retail	Arable farming	grains	flour	Ecology, Social, Economy	various	regionality	Organic farming	Product-coupled	"Because the "Bohlsener Mühle" brand is transparent and authentic, making it synonymous with organic products and an organic production company."	yes	yes	yes	yes	public actor	???	Farmers Retailers Consumers Processors	4	Bioladen, Biomare Mühle	Support for organic farming	n.n.	Yes (specialized)
25	Spielberger Mühle	https://www.spielberger-muehle.de/de/	various	Private business, Processer	organic farming	Germany	specialized food retail	Arable farming	various	grain, rice	Ecology, Social, Economy	various	soil	Organic farming	Product-coupled	"Because the sustainable protection of our environment has always been a central concern for us, we have been committed to biodynamic agriculture since the late 1950s."	yes	yes	yes	yes	public actor	Wissenschaft	Farmers, retailers, consumersr	3	Biomare, Mühlenladen, (Verschiedene Landwirte werden auf der Homepage vorgestellt)	Support for organic farming	seed research centre	Yes (specialized)
26	Followfood	https://followfood.de/	various	Private business, Processer	organic farming	Germany	specialized food retail	various	various	various, e.g. fish	Ecology	various	variuos	Organic farming	Product-coupled	"followfood is not just a food company. Followfood is a movement that advocates for a shift to 100% organic farming and 100% sustainable fishing.	yes	yes	yes	yes	public actor	???	Farmers, retailers, consumers	3	n.n.	Support for organic farming	n.n.	Yes (specialized)
27	Söbbeke - Pauls Biomolkerei	https://www.soebbeke.de/wusstest-du-schon/	various	Private business, Processer	organic farming	Germany	various	animal husbandry	dairy products	milk	Ecology, Social, Economy	various	soil	Organic farming	Product-coupled	"Organic is in our nature"	yes	yes	yes	yes	public actor	??	Farmers, retail, employees	3	Milchbauern, Lebensmitteleinzelhandel, Mitarbeiter	Support for organic farming	n.n.	Yes (specialized)
28	Biotopia	https://www.biotopia-greifenhagen.de/	various	Private business, Processer	organic farming	Saxony-Anhalt	specialized food retail	various	various	various, e.g. vegetables	Ecology	various	soil	Organic farming	Product-coupled	"We see our work as a contribution to increasing the quality of life in the region by preserving the cultural landscape and natural resources, creating livable training and jobs, and strengthening regional economic cycles through intensive cooperation with other organic farms in the region."	yes	yes	yes	yes	public actor	???	Farmers Retail Consumers	???	n.n.	Support for organic farming	n.n.	Yes (specialized)
29	Gläserne Molkerei	https://glaeserne-molkerei.de/	Dairy products	Private business, Processer	organic farming	Germany	specialized food retail	animal husbandry	dairy products	dairy products	Ecology, Social	various	regionality	Organic farming	Product-coupled	n.n.	yes	yes	yes	yes	private and public actor	???	Farmers, consumers, suppliers	3	n.n.	Support for organic farming	n.n.	Yes (specialized)
30	bioverde	https://www.bio-verde.de/	various	Private business, Processer	organic farming	Europe	specialized food retail	various	various	various	Ecology, Social, Economy	various	Animal protection	Organic farming	Product-coupled	Selected organic raw materials and artisan processing - the bio-verde concept for success since 1986. For our natural delicatessen products we use only absolutely flawless raw materials from controlled organic cultivation. Of course, all bio-verde products are free of hormones, irradiation or genetically modified organisms (GMOs). " Q	yes	yes	yes	yes	public actor	???	various	??	n.n.	Support for organic farming	n.n.	Yes (specialized)
31	Sojade	https://www.sojadebio.de/sojade-ist/	various	Private business, Processer	organic farming	Europe	specialized food retail	Arable farming	various	various, e.g. tofu	Ecology, Social, Economy	various	climate and water protection	Organic farming	Product-coupled	"healthy eating with pleasure!"	yes	yes	yes	yes	public actor	???	n.n.	???	n.n.	Support for organic farming	n.n.	Yes (specialized)
32	Land Gemacht	https://www.lebensgarten.net/index.php?content=landgemacht	various	Private business, Processer	organic farming	Saxony	Food retail	Arable farming	grains	grain	Ecology, Social, Economy	various	various	Organic farming	Product-coupled	n.n.	yes	yes	yes	yes	public actor	???	n.n.	??	n.n.	Support for organic farming	n.n.	Yes (specialized)
33	Bauck Hof	https://www.bauckhof.de/	Bread, meat	Private business, Processer	organic farming	Germany	various	Arable farming	various	various, e.g. flour	Ecology, Social, Economy	various	soil	Organic farming	Product-coupled	n.n.	yes	yes	yes	yes	public actor	Durchführung von Forschungsprojekten (Landbauforschungsgesellschaft)	n.n.	???	n.n.	Support for organic farming	yes	Yes (specialized)
34	Mühle Polkenburg	http://polkenmuehle.de/start.htm	Bread	Private business, Processer	conventional	Saxony	specialized food retail	Arable farming	various	various	Ecology, Social, Economy	climate	climate, regionality	Short transportation	Product-coupled	From our region, for our region!	no	no	no	no	n.n.		farmers, retailers	2	Landwirte, Bäckereien	n.n.	n.n.	Yes (specialized)
35	Oat-ly	https://www.oatly.com/de/	Oat milk	Private business, Processer	conventional + organic farming	International	Food retail	Arable farming	various	various, e.g. oat	Ecology	various	climate	Sustainable packaging	Product-coupled	"Oat drink with carbon dioxide equivalents".	yes	yes	no	yes	public actor	Wissenschaft	n.n.		n.n.	n.n.	yes	Yes (specialized)
36	Klaus Fruchtsäfte & Cannewitzer Biere	http://www.klaus-fruchtsaefte.de/	Beverages	Private business, Processer	conventional + organic farming	Germany	various	horticulture	various	various, e.g. apples	Ecology	various	regionality	Use of organically grown fruit	Product-coupled	n.n.	yes	yes	yes	yes	public actor		Consumers, farmers, retailers, processors	3	Konsument*innen, Landwirte, Einzelhandel, Verarbeiter	Support for organic farming	n.n.	Yes (specialized)
37	Joe clever	http://www.vogtlandmilch.de/unternehmen.html	dairy substitutes	Private business, Processer	conventional	Germany	various	animal husbandry	dairy products	dairy products	Ecology, Social, Economy	various	climate and soil protection	Compliance with environmental policy, measures for energy saving	Product-coupled	Our motto: quality and freshness - our commitment to the customer.	yes	yes	yes	yes	public actor		Farmers, public institutions, retail trade, processors	3	Landwirte, Schulen, Einzelhandel, Verarbeiter	n.n.	n.n.	n.n.
38	Honigprinz	https://www.honigprinz.de/	Honey	Producer	conventional	Germany	various	beekeeping	honey	honey	Ecology	Biodiversity	biodiversity, species protection	n.n.	Product-coupled	The Honey Prince is the family apiary of the Ueberschär family. Three brothers who have a great passion for beekeeping for many years. We have made it our mission to preserve the bee population in Germany.	n.n.	n.n.	n.n.	n.n.	n.n.		Beekeepers, processors, retail	3	Imker, Verarbeiter, Einzelhandel	n.n.	n.n.	n.n.
39	Walter Popp	https://popp-feinkost.de/start.html	various	Private business, Processer	conventional + organic farming	Germany	Food retail	Arable farming	various	various, e.g. potatoes	Ecology	climate	climate	Avoidance of food waste through app (portioned food), reduction of emissions, contribution to climate protection projects	Product-coupled	Mine, Yours, Fine Food.	yes	yes	yes	yes	public actor		n.n.		n.n.	Support for organic farming	n.n.	Yes (specialized)
40	Arla	https://www.arlafoods.de/	dairy substitutes	Private business, Processer	conventional + organic farming	Europe	Food retail	Arable farming	various	various, e.g dairy products	Ecology, Economy	various	climate	Reduction of food waste, sustainable packaging, renewable energies	Product-coupled	Owned by our dairy farmers. Arla is owned by the dairy farmers who supply most of our milk	yes	yes	yes	yes	public actor		Farmers, retailers, processors	3	Landwirte, Einzelhandel, Verarbeiter	Support for organic farming	n.n.	Yes (specialized)
41	MoorFutures	https://www.moorfutures.de/projekte/polder-kieve-mecklenburg-vorpommern/	Certificates	State	conventional + organic farming	Germany	Online certificates trading	animal husbandry	various	various, e.g. meat (beef)	Ecology	climate	climate	Deconstruction of the pumping station, injection of additional water, redesign of the irrigation system, fixed ditch dams, embankment,	own market	Investment meets climate protection	yes	yes	yes	n.n.	private and public actor		Land owners and managers State government Project management Buyer planning office construction company Research	6	k.A. Min. f. Landwirtschaft M-V Landgesellschaft M-V mbH IHU Geologie und Analytik mbH Meliorations-, Tief- und Straßenbau GmbH Uni Greifswald	Support by regional government (Land Mecklenburg-Vorpomemrn)	yes	n.n.
42	Taraxagum	https://www.ime.fraunhofer.de/de/wissenschaftsjahr-2020-biooekonomie/loewenzahn---die-neue-kautschukquelle.html https://bikeshop.continental-reifen.de/fahrradreifen/urban-tour/35-622-urban-taraxagum-black-black-foldable-skin.html# https://www.continental-reifen.de/autoreifen/ueber-continental/media-services/archiv/archiv-2018/20181206-continental-eroeffnet-taraxagum-lab-anklam	Bycicly tires	Private business, Processer	conventional + organic farming	International	various	Arable farming	Dandelion	dandelion rubber	Ecology	various	Species protection	Targeted breeding of Russian dandelion (doubling of rubber content)	Product-coupled	Continental develops sustainability; The dandelion - grown in Germany; The tire - made in Germany	n.n.	yes	n.n.	n.n.	n.n.		Producer; Company; Research; Customer	4	Landwirt in M-V, Continental, JKI, Fraunhofer	BMBF	yes	Yes (specialized)
43	Kiezbett	https://www.kiezbett.com/massivholzbett-zum-ruhig-schlafen#wald	Wood	Private business, Processer	organic farming	Berlin	various	forestry	Wood	wooden bed	Ecology, Social	various	regionality	Wood from Berlin forests (Naturland certified), reduction of transport journeys, logging method with horses (gentle on the soil), 4 new plantings per bed in Berlin, 10 new plantings per bed outside Berlin	Product-coupled	social, organic, regional!	yes	yes	yes	yes	n.n.		Producer, Dealers Processors, production, Company, Consumer	6	Berliner Forsten, Klöpferholz Stephanus Stiftung (Förderwerkstatt) Kiezbett	n.n.	n.n.	Yes (specialized)
44	Berchtesgardener Land	https://bergbauernmilch.de/de/unsere-milch.html	Dairy products	Private business, Processer	conventional + organic farming	Germany, Austria, Switzerland, Italy	Food retail	animal husbandry	dairy products	dairy products	Ecology, Social, Economy	various	various	Free stall premium, free range premium, pasture premium, barn construction seminars, energy saving measures, "Rosenheimer Landstrom", gas turbine, environmentally friendly packaging (FSC, plant-based coating)	Product-coupled	Unique milk has a unique home	yes	yes	yes	n.n.	n.n.		Erzeuger, Verarbeiter, Leh	3	1.800 Landwirte (davon 650 Bergbauern, 500 konventionelle Betriebe, 650 Biobetriebe) Molkerei LEH	Second pillar CAP	n.n.	Yes (specialized)
45	Taifun		Soy products	Private business, Processer	organic farming	Europe	specialized food retail	Arable farming	soy	tofu	Ecology, Social	various	various	Only ingredients from controlled organic cultivation, GMO-free, green electricity (Stadtwerke Mühlheim), common good balancing, circular economy, CO2 balancing of individual products	Product-coupled	n.n.	yes	yes	n.n.	n.n.	n.n.		Producer, Processor, Production LEH	3	70 Vertragslandwirte in drei Anbauregionen in Deutschland, Österreich und Frankreich Taifun GmbH Bio-Mühlen	n.n.	University Hohenheim	Yes (specialized)
46	Olio Bric	https://www.oliobric.com/ueber-uns/	Briquettes	Private business, Processer	organic farming	Germany, Austria, Switzerland	specialized food retail	olives	Olives	olives	Ecology	various	regionality	Third stage of use of olives (oil production, lime burning and barbecue briquettes). Bio-starch, water recycling FSC certified bags, Per unit sold, fixed amount to NABU for the financing of environmental and conservation projects	Product-coupled	n.n.	yes	n.n.	n.n.	n.n.	n.n.		Producer Processor Retailer Civil society	3	Olivenproduzenten Klimis GmbH (Griechenland) FRUTEG GmbH (Deutschland) NABU	n.n.	n.n.	Yes (specialized)
47	Quartiermeister	https://quartiermeister.org/de/quartiermeister/#unser-manifest	Beer	Civil Society	conventional + organic farming	Berlin, Leipzig, Dresden, München	various	Arable farming	various	beer	Ecology, Social	various	various	10 Ct./liter to social projects in the neighborhood	Product-coupled	Public interest oriented management	yes	yes	yes	n.n.	civil society actor		Erzeuger Verarbeiter Vertrieb Verein	4	Stadtbrauerei Wittichenau und Genossenschaftsbrauerei Gut Forsting Quartiermeister (Unternehmen + Verein)	Bosch foundation	n.n.	Yes (specialized)
48	Markta		various	Private business, Processer	organic farming	Germany	various	various	various	various	Ecology, Economy	various	various	n.n.	Product-coupled	n.n.	n.n.	n.n.	n.n.	n.n.	n.n.		n.n.		n.n.	n.n.	n.n.	Yes (specialized)
49	Marktschwärmer	https://marktschwaermer.de/de/assemblies/11658/collections/232614/products/716289	various	Civil Society	conventional + organic farming	Europe	Direct sales channel	various	various	various	Ecology, Economy	various	regionality	Producers set selling price, define minimum order value (if it is fallen short of, does not have to be delivered) Will be delivered only what has been ordered and paid in advance, short market hours (2h)	Product-coupled	n.n.	partly	n.n.	yes	n.n.	n.n.		Producer Marketplace	2	Regionale Erzeuger Marktschwärmer Schwärmereien	n.n.	n.n.	Yes (specialized)
50	Klima Landwirt	https://www.carbocert.de/humuszertifikate/humuszertifikate-fuer-landwirte https://www.carbocert.de/humuszertifikate/humuszertifikate-fuer-landwirte	Certificates	Private business, Processer	conventional + organic farming	Germany, Austria, Switzerland, Italy	Online certificates trading	Arable farming	various	various	Ecology, Economy	climate	climate protection	Measures to build up humus New revenue model: humus certificate Compensation of CO2 emitters through the purchase of certificates When building up humus, a revenue of about 60 - 90 € per ha and year can be realized on average by trading CO2 certificates. Subject to market realization. Per year an increase of 0,05 - 0,10 % humus is realistic. This with consistent implementation of regenerative agr…	own market	n.n.	yes	yes	yes	yes	private actor		Farmer IT Company Certifier	3	NEXT-Farming CarboCert	n.n.	n.n	Yes (specialized)
